# Supplementary material
Source: PubMed Central journal article supplement (PMC2851640)

**Fig. S1.** Reduction of centrosome components after RNAi. S2 cell cultures were subjected to immunoblotting after 4 days of treatment with dsRNA targeted against D-TACC, CP60, CP190, Msps, Cnn, Dgrip84 and  $\gamma$ -tubulin 23C. This immunoblot analysis is representative of three separate RNAi experiments, and lanes contained equal loads of total protein as determined by Bradford analysis. Quantitative analysis using NIH image software indicated > 90% reduction for D-TACC, CP60 and Cnn and at least 80-90% reduction of the other four proteins tested.

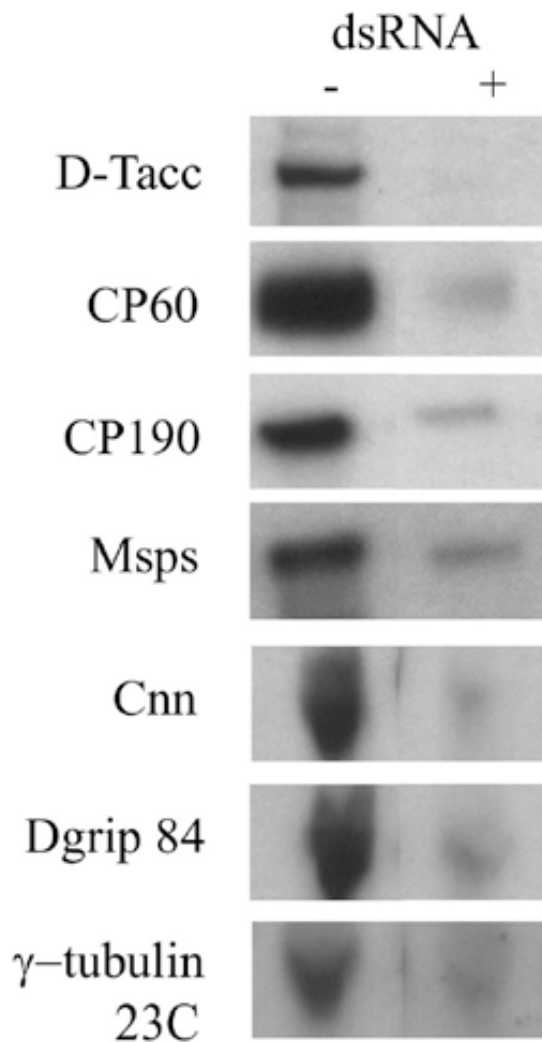

Supplement: NIHMS181554-supplement-Fig_S1.pdf [file NIHMS181554-supplement-Fig_S1.pdf]
