# Supplementary material
Source: PubMed Central journal article supplement (PMC2851640)

**Fig. S3.** RNAi phenotype of Dmob4 is not due to off-target effects. A) The segment of Dmob4's mRNA sequence targeted by RNAi in our screen, "Original Coding/UTR dsRNA," stretches from the C-terminal coding sequence of Dmob4 into the transcript's 5'-UTR. Two additional dsRNA sequences corresponding exclusively to either the coding or 5'-UTR regions of Dmob4's mRNA, "Coding dsRNA" and "UTR dsRNA," respectively, were synthesized to control for potential off-target effects (Kulkarni et al. [2006]. *Nature Methods* **3**, 833-838.) associated with RNAi using the original coding/UTR dsRNA. B) The monopolar, monastral bipolar, and disorganized spindle phenotypes initially observed for Dmob4 using the "Original coding/UTR" dsRNA sequence were shared by cells depleted of Dmob4 using the "Coding" and "UTR" dsRNA sequences.

**A**

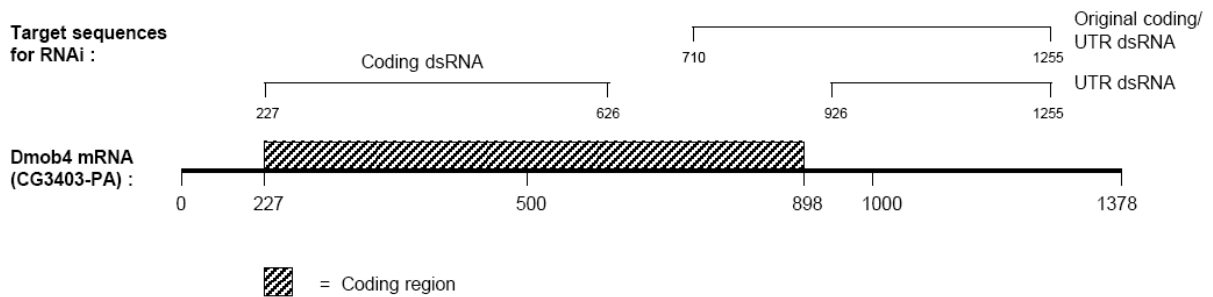

**B**

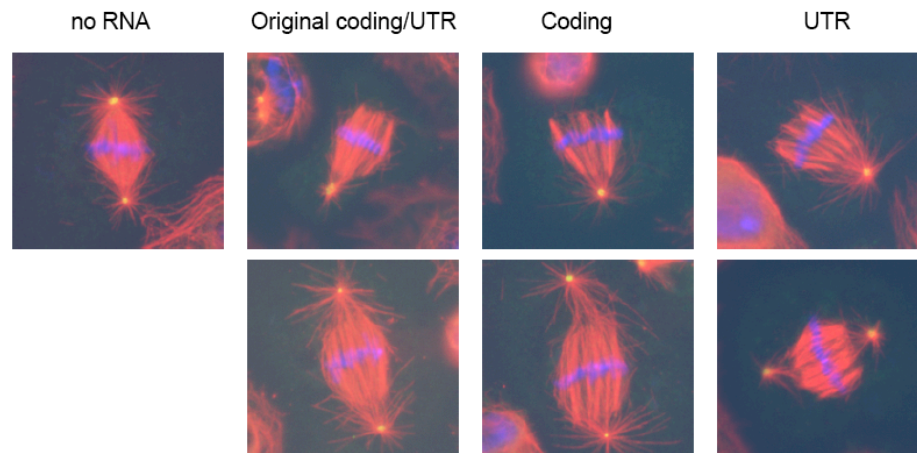

Supplement: NIHMS181554-supplement-Fig_S3.pdf [file NIHMS181554-supplement-Fig_S3.pdf]
