# Supplementary material
Source: PubMed Central journal article supplement (PMC2851640)
Supplement: NIHMS181554-supplement-M_Leg.pdf [file NIHMS181554-supplement-M_Leg.pdf]

## **Movie Legends**

***Mob4 plays a role in spindle focusing in Drosophila S2 cells***  
***J Cell Sci Trammell et al. 121: 1284***

Movie 1. Time-lapse movie of cell shown in Fig. 2A. Control GFP-tubulin cell with no RNAi treatment. Images were acquired every 10 seconds.

Movie 2. Time-lapse movie of cell shown in Fig. 2B. Mob4-RNAi-treated cell with monoastral bipolar spindle. Images were acquired every 10 seconds.

Movie 3. Time-lapse movie of cell shown in Fig. 2C. Mob4-RNAi-treated cell with two centrosomes and bipolar spindle. Images were acquired every 15 seconds.

Movie 4. Time-lapse movie of Mob4-RNAi-treated GFP-tubulin cell with two active centrosomes. Images were acquired every 10 seconds. Only the centrosome on the left participates in spindle formation, while the centrosome on the right does not. A monoastral bipolar spindle begins to form as a result.

Movie 5. Time-lapse movie of Mob4-GFP tubulin cell shown in Fig. 7. Images were acquired every 10 seconds. With the exception of a slight decrease in Mob4-GFP fluorescence at the kinetochore pair on the mono-oriented chromosome just before it is aligned on the metaphase plate, Mob4-GFP is present at both spindle poles and kinetochores and weakly throughout the spindle at various stages of mitosis.
