# Supplementary material
Source: PubMed Central journal article supplement (PMC2851640)
Supplement: NIHMS181554-supplement-Tab_S2.pdf [file NIHMS181554-supplement-Tab_S2.pdf]

**Table 2S. Double RNAi experiments**

| Protein name                       | Phenotype                   | Abnormal spindles $\pm$ s.d. in % ( <i>n</i> )* | $\gamma$ -tubulin localization $\pm$ s.d. % cells ( <i>n</i> ) <sup>†</sup> |
|------------------------------------|-----------------------------|-------------------------------------------------|-----------------------------------------------------------------------------|
| D-TACC/Pericentrin                 | Normal                      | 31 $\pm$ 8.0 (253)                              | 99 $\pm$ 1 (84)                                                             |
| Asp/ $\gamma$ -tubulin 23C         | Monopolar/anastral spindles | 99 $\pm$ 1.0 (249)                              | 4 $\pm$ 2 (143)                                                             |
| Asp/Centrosomin                    | Anastral spindles           | 92 $\pm$ 5.5 (132)                              | 20 $\pm$ 6 (151)                                                            |
| Centrin1/Centrin2                  | Normal                      | 24 $\pm$ 4.2 (189)                              | 98 $\pm$ 3 (128)                                                            |
| Mps1/Dmob2                         | Monopolar spindle           | 36 $\pm$ 7.8 (198)                              | NA                                                                          |
| Dmob2/Dmob1                        | Normal                      | 24 $\pm$ 7.6 (239)                              | n.a.                                                                        |
| Mps1/Dmob4                         | Monastral/monastral bipolar | 52 $\pm$ 4.0 (155)                              | n.a.                                                                        |
| Dmob4/Dmob3                        | Monopolar                   | 65 $\pm$ 1.3 (268)                              | 98 $\pm$ 3 (122)                                                            |
| Dgrip84/ $\gamma$ -tubulin 37C     | Monopolar spindle           | 37 $\pm$ 2.6 (145)                              | 27 $\pm$ 10 (127)                                                           |
| Dgrip128/ $\gamma$ -tubulin 37C    | Monopolar spindle           | 70 $\pm$ 4.0 (262)                              | 98 $\pm$ 2 (128)                                                            |
| Dgrip163/ $\gamma$ -tubulin 37C    | Monopolar spindle           | 59 $\pm$ 9.0 (262)                              | 96 $\pm$ 4 (100)                                                            |
| Dgrip91/ $\gamma$ -tubulin 37C     | Monopolar spindle           | 52 $\pm$ 10 (292)                               | 96 $\pm$ 4 (100)                                                            |
| Dgrip75/ $\gamma$ -tubulin 37C     | Monopolar spindle           | 71 $\pm$ 9.0 (279)                              | 98 $\pm$ 2 (172)                                                            |
| Dgrip71/ $\gamma$ -tubulin 37C     | Monopolar spindle           | 57 $\pm$ 12 (255)                               | 98 $\pm$ 2 (111)                                                            |
| Dgrip223/ $\gamma$ -tubulin 37C    | Normal                      | 34 $\pm$ 4.0 (239)                              | 99 $\pm$ 2 (113)                                                            |
| Dgrip84/Dgrip128                   | Monopolar/anastral spindles | 94 $\pm$ 2.0 (325)                              | 28 $\pm$ 7 (162)                                                            |
| D-TACC/Minispindles                | Multiple spindle defects    | 66 $\pm$ 16 (287)                               | 98 $\pm$ 2 (125)                                                            |
| Minispindles/ $\gamma$ -tubulin37C | Monopolar spindles          | 95 $\pm$ 2.0 (208)                              | 5 $\pm$ 4 (160)                                                             |
| Minispindles/Asp                   | Anastral bipolar spindles   | 87 $\pm$ 4.0 (129)                              | 95 $\pm$ 4 (111)                                                            |
| Pericentrin-2/3                    | Normal                      | 24 $\pm$ n.a. (151)                             | 100 $\pm$ n.a. (55)                                                         |
| Pericentrin-1/2/3                  | Normal                      | 30 $\pm$ n.a. (135)                             | 95 $\pm$ n.a. (66)                                                          |

For complete gene information, including CG identification numbers and RNAi primer sequences, see supplementary Table S1. Cells were analyzed on day 4 or 5 of RNAi treatment. Averages and s.d. values reflect values of three individual experiments, unless noted otherwise.

\*Calculated by averaging the fold increase in mitotic index for three separate RNAi experiments (mean  $\pm$  s.d.). In each individual experiment, the mitotic index for each sample was divided by the average mitotic index for >15 untreated samples. n.a., too few cells available for analysis.

<sup>†</sup>Percent of cells with localized  $\gamma$ -tubulin, average of three experiments (mean  $\pm$  s.d.). n.a., too few cells available for analysis.
